# Supplementary material
Source: PubMed Central journal article supplement (PMC4759241)

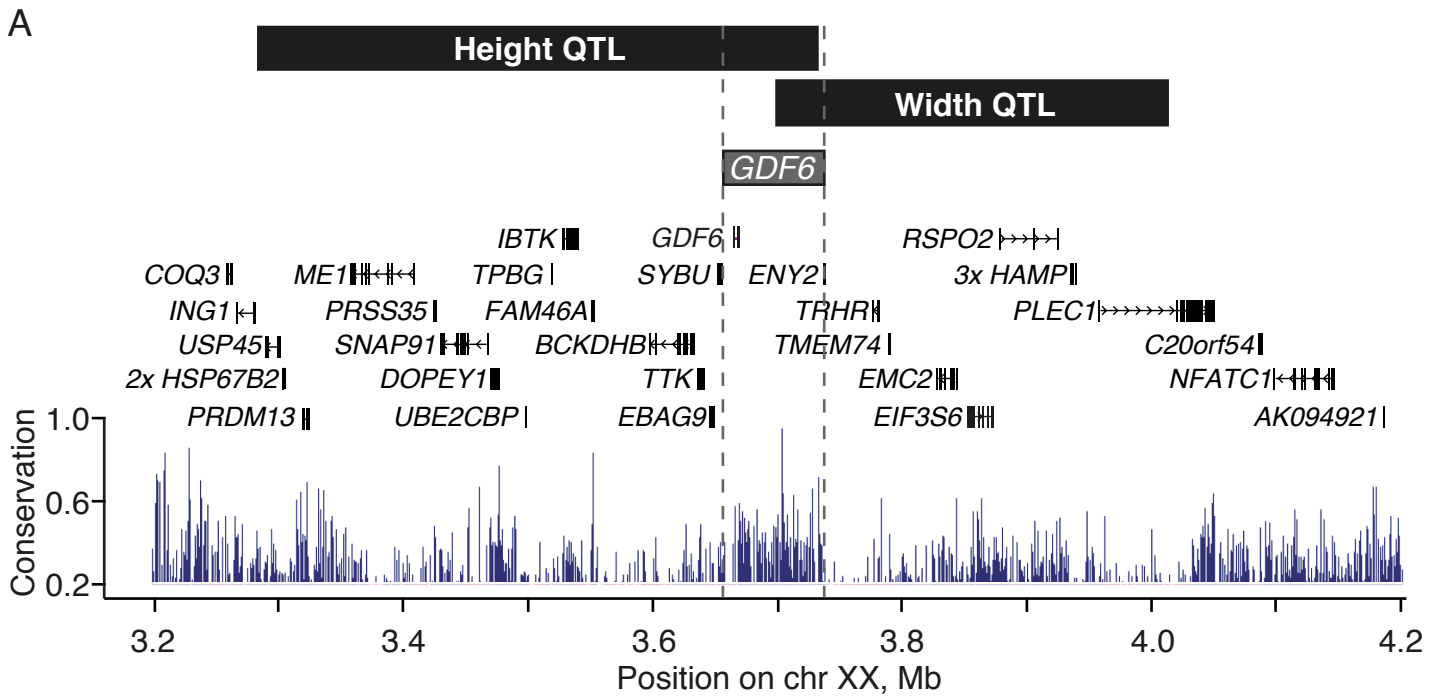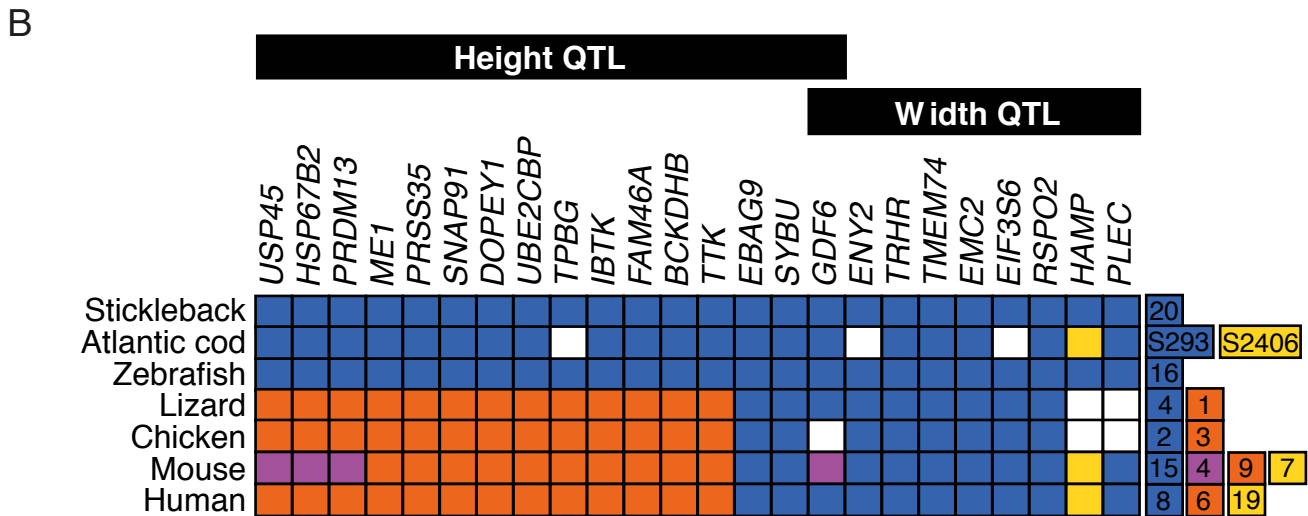

Supplement: NIHMS749684-supplement-1.pdf [file NIHMS749684-supplement-1.pdf]

Indjeian *et al.*, Figure S2, Related to Figure 2

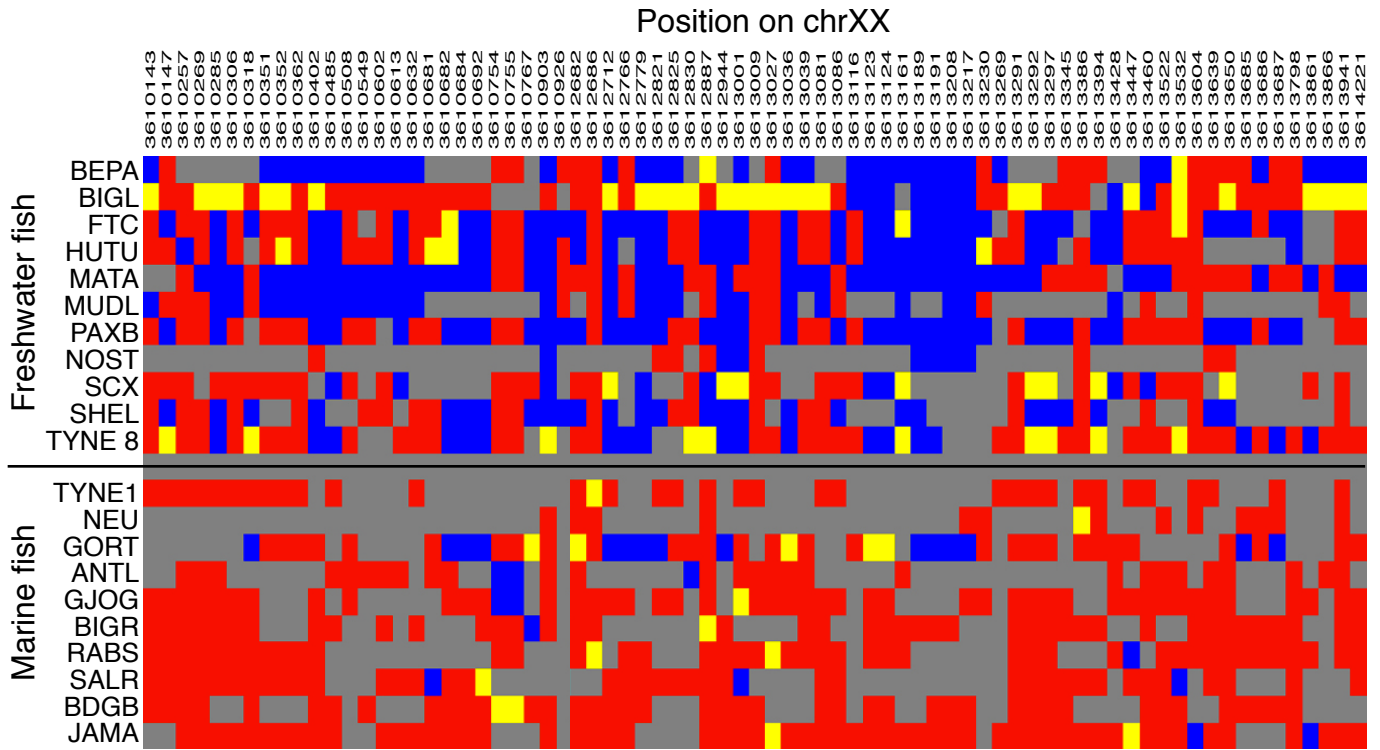

Supplement: NIHMS749684-supplement-2.pdf [file NIHMS749684-supplement-2.pdf]

Indjeian *et al.*, Figure S3, Related to Figure 3

Control

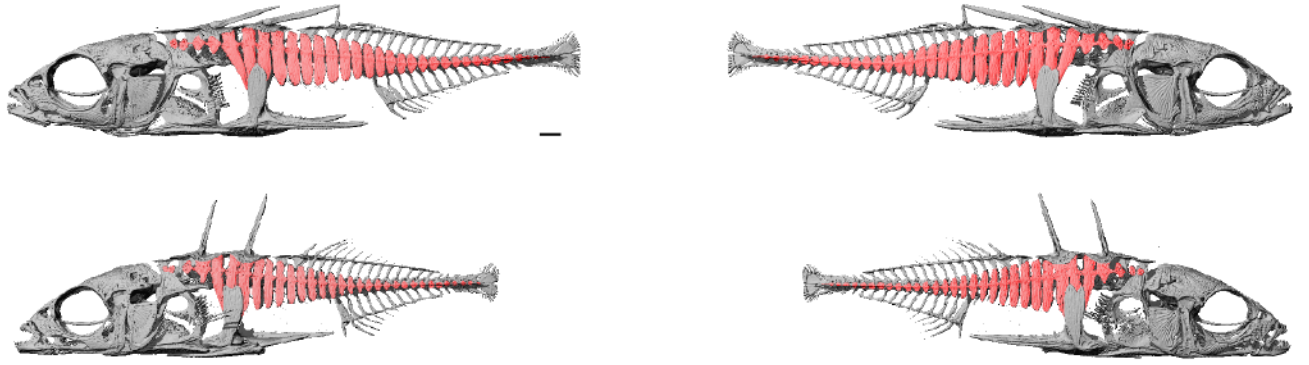

GDF6 transgenic

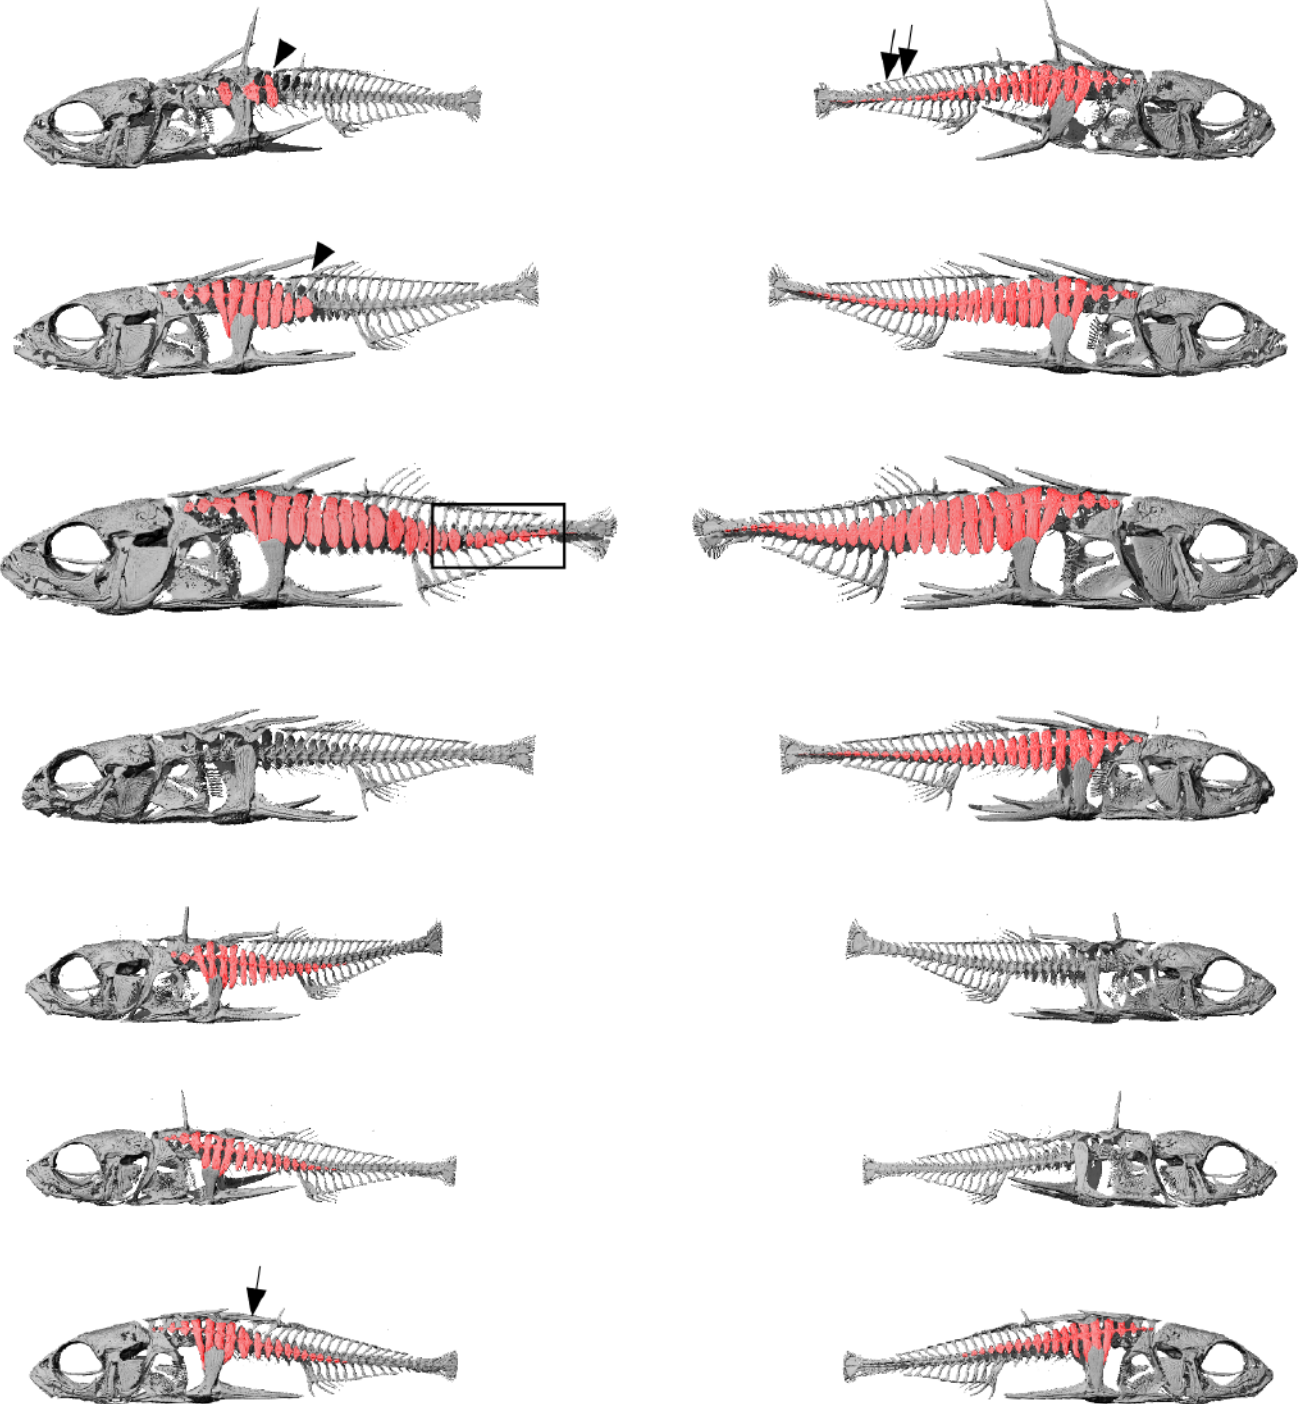

Supplement: NIHMS749684-supplement-3.pdf [file NIHMS749684-supplement-3.pdf]

Indjeian *et al.*, Figure S4, Related to Figure 4

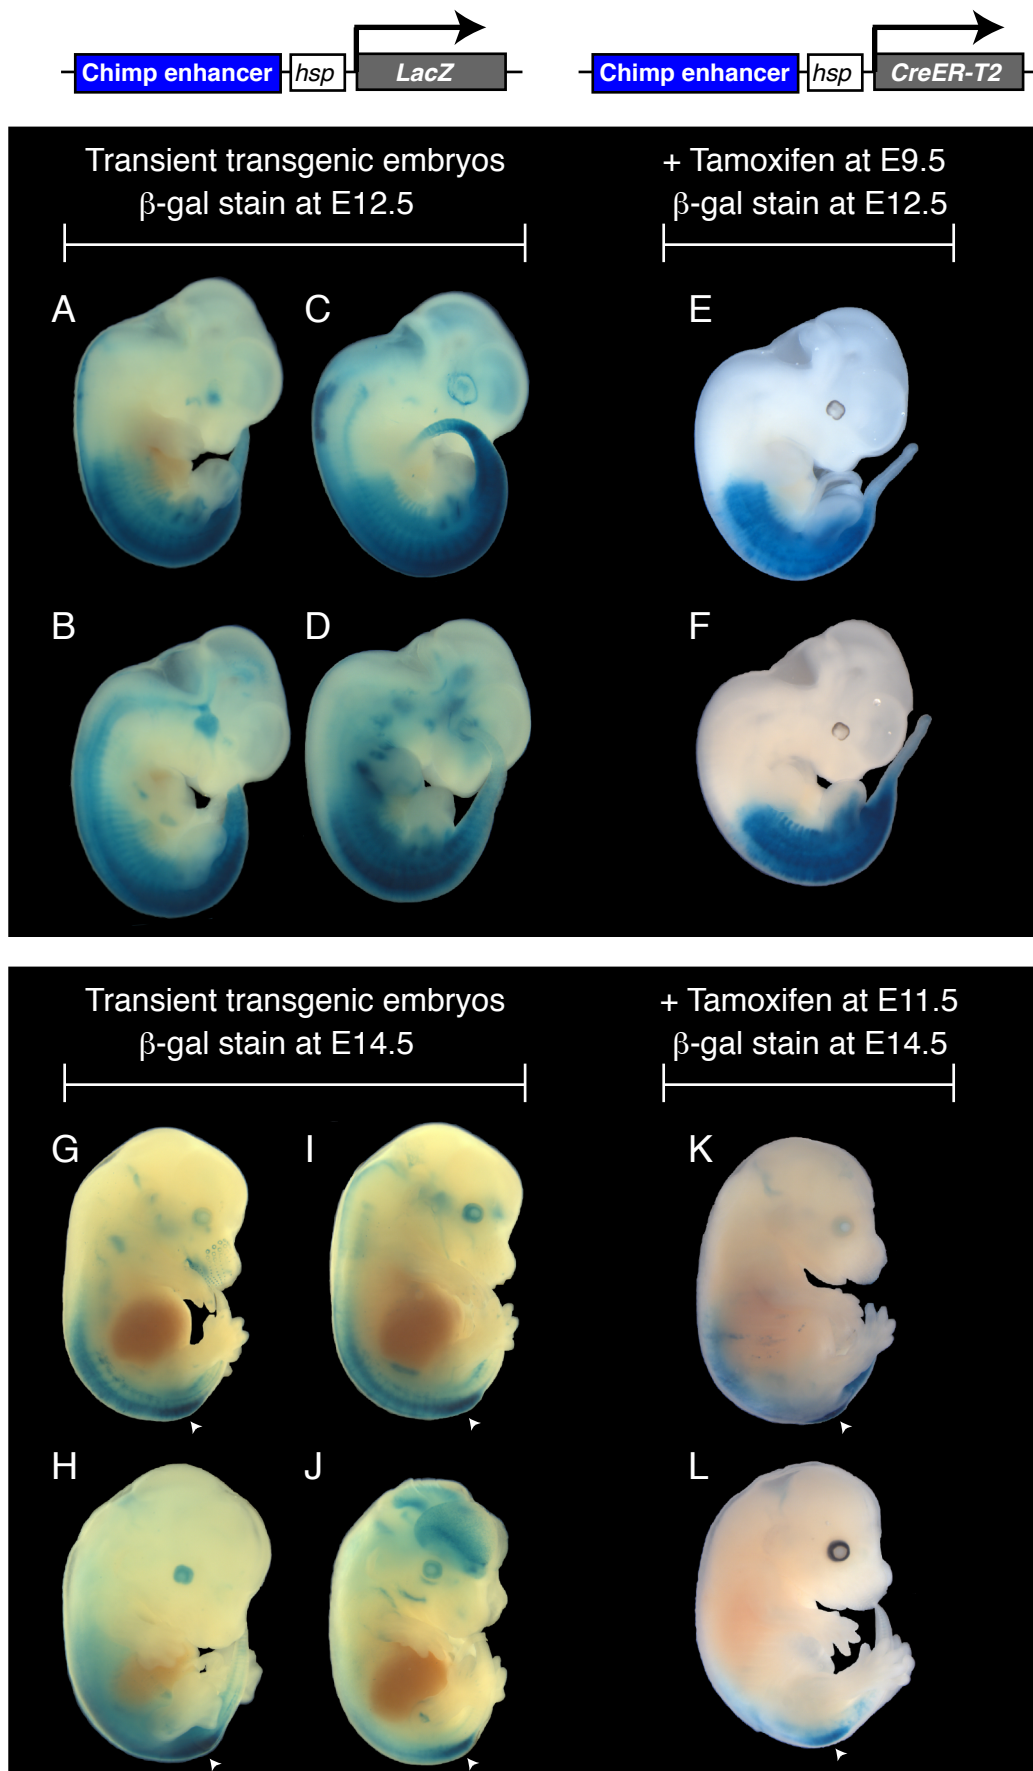

Supplement: NIHMS749684-supplement-4.pdf [file NIHMS749684-supplement-4.pdf]

Indjeian *et al.*, Figure S5, Related to Figure 5

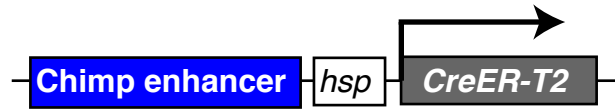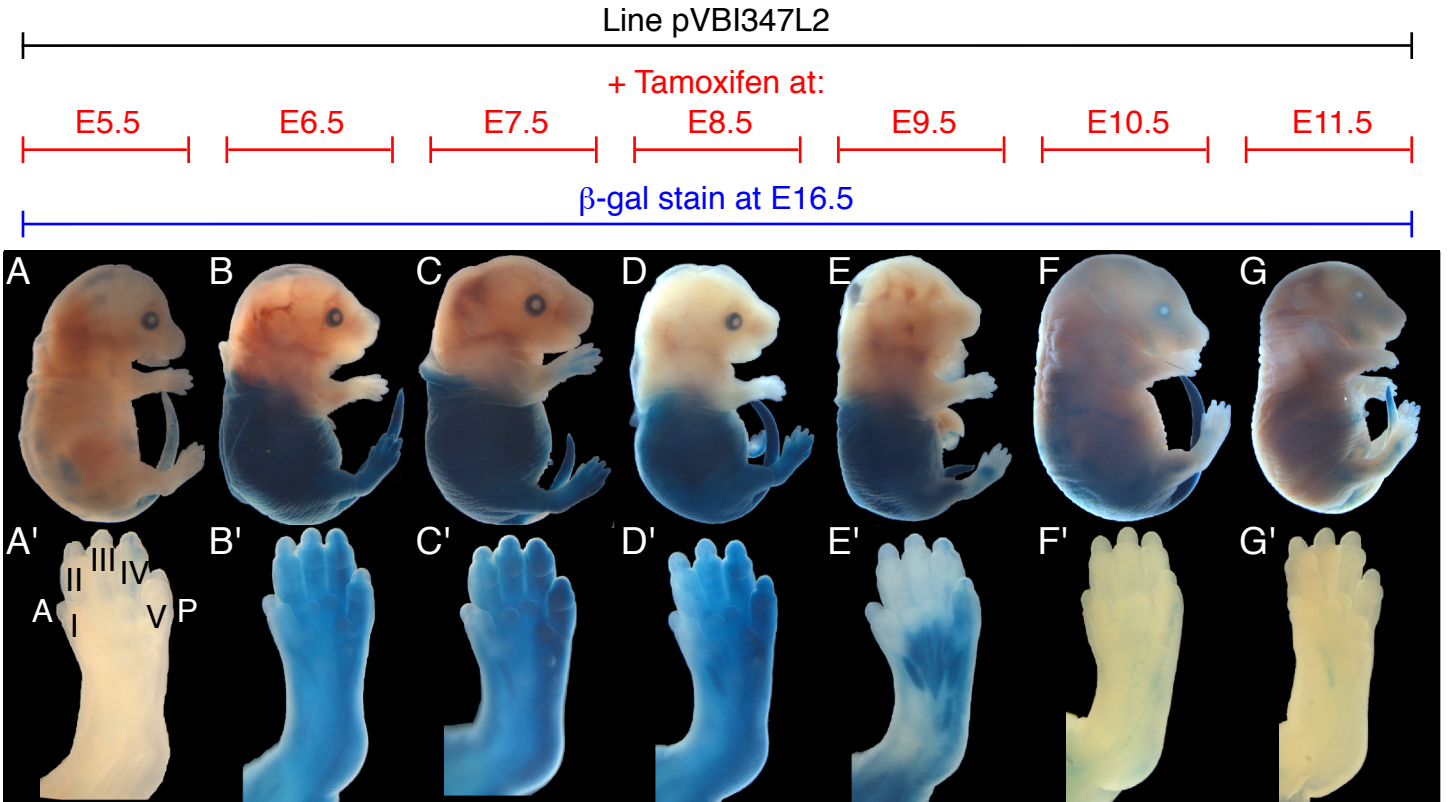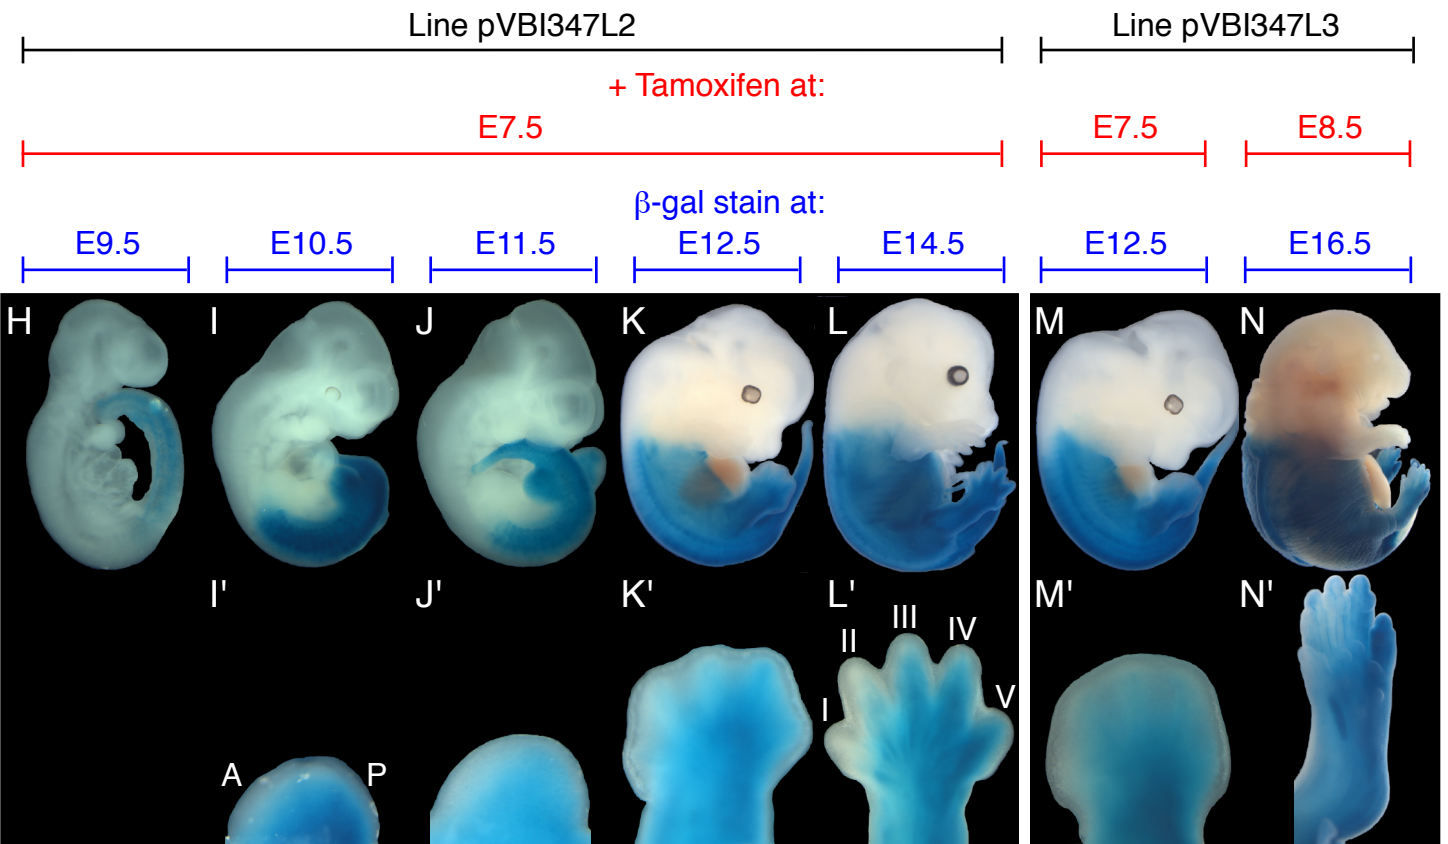

Supplement: NIHMS749684-supplement-5.pdf [file NIHMS749684-supplement-5.pdf]

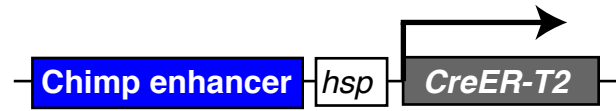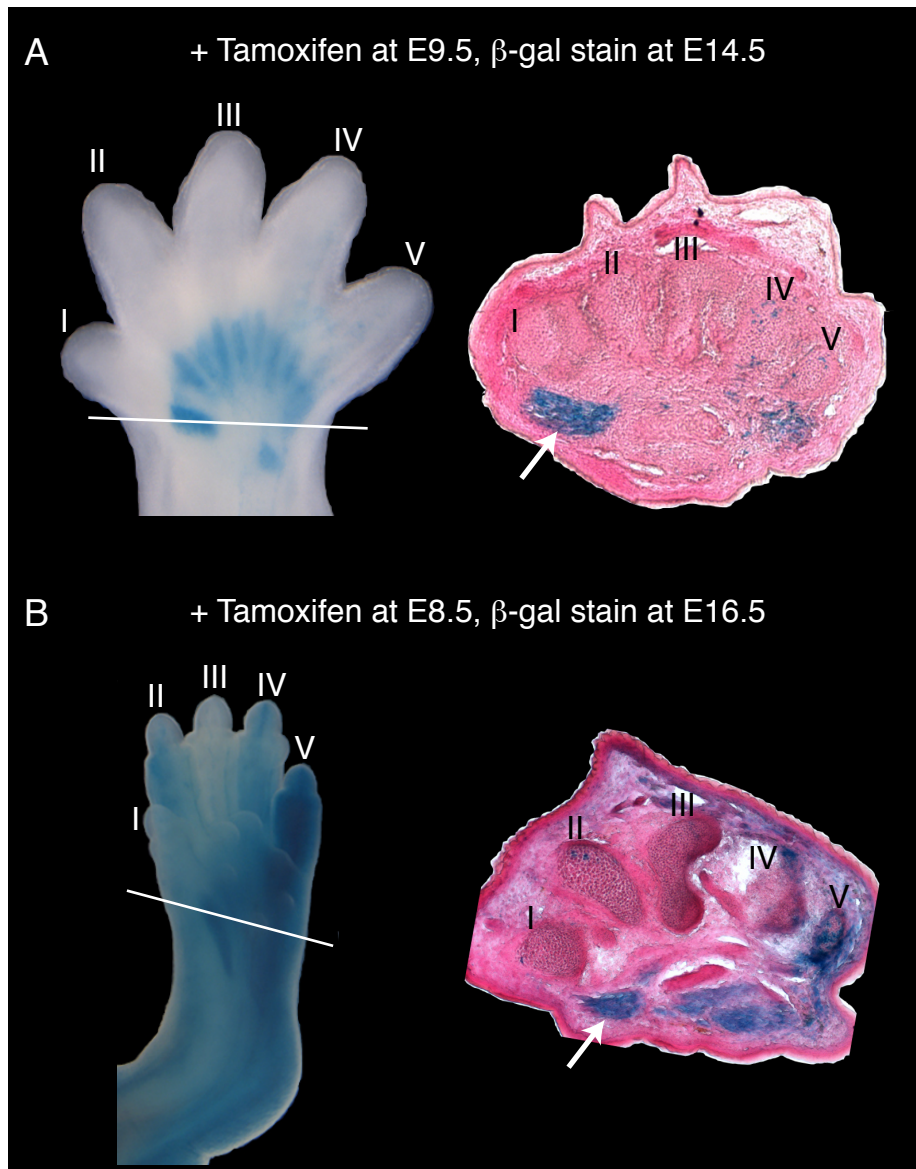

Supplement: NIHMS749684-supplement-6.pdf [file NIHMS749684-supplement-6.pdf]
